# Supplementary material
Source: PubMed Central journal article supplement (PMC3320853)
Supplement: NIHMS288111-supplement-Supp1.pdf [file NIHMS288111-supplement-Supp1.pdf]

**Table S1. Oligonucleotide primers used for RT-PCR.**

| Protein /gene               | Accession # | Forward Primer (5'→3')        | Reverse Primer (5'→3')         | Prod, bp | Annl °C |
|-----------------------------|-------------|-------------------------------|--------------------------------|----------|---------|
| β-actin / <i>Actb</i>       | NM_007393   | caccctgtgctgctcacc            | gcacgattccctctcag              | 328      | 58      |
| NTPDase2 / <i>Entptd2</i>   | NM_009849   | agtgaggatgccacagag            | gagagcaaccaggagctga            | 299      | 63      |
| † PLCβ2 / <i>Plcb2</i>      | NM_177568   | Pr #1<br>ctcgcttgggaagttgc    | Pr #2<br>gcattgactgtcatcggt    | 226      | 58      |
|                             |             | Pr #3<br>gagcaaatcgccaagatgat | Pr #4<br>ccttgctgtggtgacctg    | 163      | 60      |
| SNAP25 / <i>Snap25</i>      | NM_011428   | ggcaataatcaggatggagtag        | agatttaaccactcccagca           | 310      | 58      |
| GAD1 / <i>Gad1</i>          | NM_008077   | agatagccctgagcgacgag          | atggccgatgattctggttc           | 240      | 59      |
| † GAD2 / <i>Gad2</i>        | NM_008078   | Pr #1<br>aatggtgtttgatggaagc  | Pr #2<br>agggtttgagatgacctgc   | 217      | 59      |
|                             |             | Pr #3<br>cattcctgtcctgcctctc  | Pr #4T<br>gtgcatcctttgtccatgt  | 271      | 59      |
| GABA-B1 / <i>Gabbr1</i>     | NM_019439   | gaatggcagtctgaagcaca          | tcgactcccacacagctaa            | 273      | 59      |
| GABA-A α1 / <i>Gabra1</i>   | NM_010250   | ccaagtctcctctggctca           | cggttctatggtcgacttt            | 261      | 59      |
| GABA-A α2 / <i>Gabra2</i>   | NM_008066   | ttgggacggaagagtgtag           | catcctgtcgattttgctga           | 232      | 59      |
| GABA-A α3 / <i>Gabra3</i>   | NM_008067   | tctccatgaccacctga             | cctggccagattgatagga            | 281      | 59      |
| GABA-A α4 / <i>Gabra4</i>   | NM_010251   | gaagtccagctgctcctgt           | tgctgaatggattggactg            | 229      | 59      |
| GABA-A α5 / <i>Gabra5</i>   | NM_176942   | gccctggaagcagctaaaat          | cgggacattttgctgatctt           | 227      | 59      |
| GABA-A α6 / <i>Gabra6</i>   | NM_008068   | ctgaaaggcaggcacaact           | taagagcaatgggggagaga           | 221      | 59      |
| GABA-A β1 / <i>Gabrb1</i>   | NM_008069   | catgggctgtttgtgttg            | acgagtacatgggtgccttg           | 260      | 59      |
| † GABA-A β2 / <i>Gabrb2</i> | NM_008070   | Pr #1<br>tatggccctctggaatagc  | Pr #2<br>cccattactgctcggatgt   | 204      | 59      |
|                             |             | Pr #3<br>acacaccacagagcatcgtc | Pr #4<br>caaatttctggagctggtacg | 283      | 59      |
| GABA-A β3 / <i>Gabrb3</i>   | NM_008071   | gaagaagcttgcggagaaga          | tggcattcacatcggttaga           | 326      | 59      |
| GABA-A γ1 / <i>Gabrg1</i>   | NM_010252   | aggcaggaagctgaaaaca           | gcaaaagctgtgggaaaaa            | 255      | 59      |
| GABA-A γ2 / <i>Gabrg2</i>   | NM_177408   | atcaatggaagcgcagtct           | taggagacctgggagagaga           | 334      | 59      |
| GABA-A γ3 / <i>Gabrg3</i>   | NM_008074   | gccaaccatcaggaagaaaa          | agcagcagaagaagctctgg           | 227      | 59      |
| † GABA-A δ / <i>Gabrd</i>   | NM_008072   | Pr #1<br>atgcattgcccacttcaa   | Pr #2<br>atgggttgagtctggaacg   | 275      | 59      |
|                             |             | Pr #3<br>ccaaaatgggacagagagga | Pr #4<br>atttcagtctgggaccaaag  | 321      | 59      |
| † GABA-A π / <i>Gabrp</i>   | NM_146017   | Pr #1<br>cctaccaacaccaactgct  | Pr #2<br>acttgcgctggcttcatt    | 287      | 59      |
|                             |             | Pr #3<br>cgactgttctgaacgatgga | Pr #4<br>cagagccatgctgatgaaaa  | 312      | 59      |
| GABA-A ε / <i>Gabre</i>     | NM_017369   | tctcacggcttggacttct           | tccagggacactgaggctt            | 331      | 59      |
| GABA-A θ / <i>Gabrq</i>     | NM_020488   | accgctaccaagaagtgtg           | ggcagatcactcaggcttc            | 250      | 59      |
| GABA-A ρ1 / <i>Gabrr1</i>   | NM_008075   | tgctgtagagtcccctta            | caggtcgtcaccttccat             | 299      | 59      |
| GABA-A ρ2 / <i>Gabrr2</i>   | NM_008076   | cagagtctactgggcatca           | ctggcagaatgtggcttct            | 323      | 59      |
| GABA-A ρ3 / <i>Gabrr3</i>   | BC151105    | caactcaacaggaggggaaa          | ctcccagggttctctttt             | 205      | 59      |

† Two primer pairs were used for these genes. Primers 1,2 were used for end-point RT-PCR. Primers 3,4 were used only on single cell amplified RNA to improve yield.

Conditions for PCR were 95°C for 5 min, followed by 40 cycles (30 sec each at 94°C, annealing temperature, and 72°C).

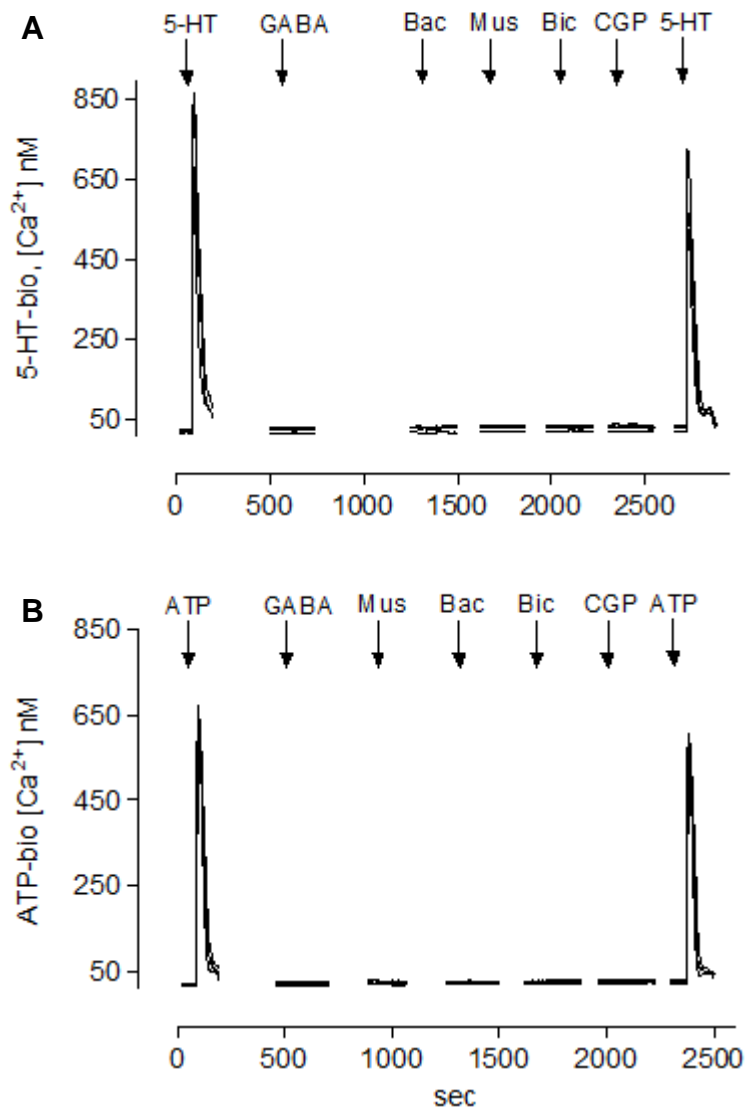

Figure S1

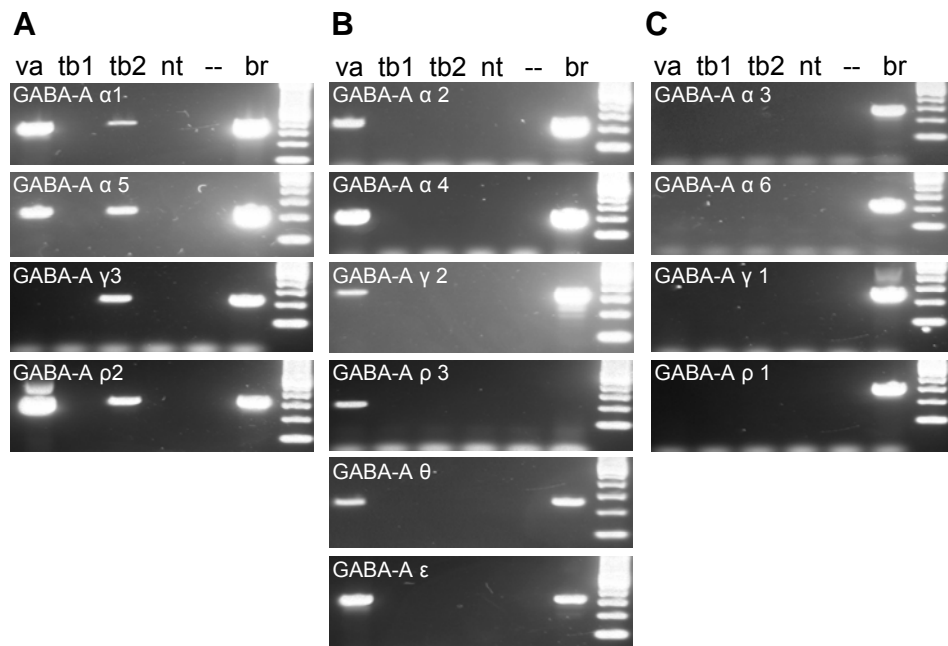

Figure S2

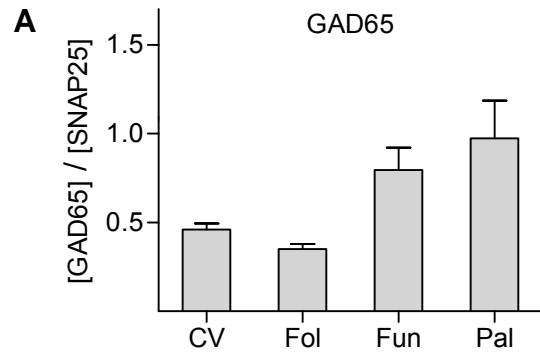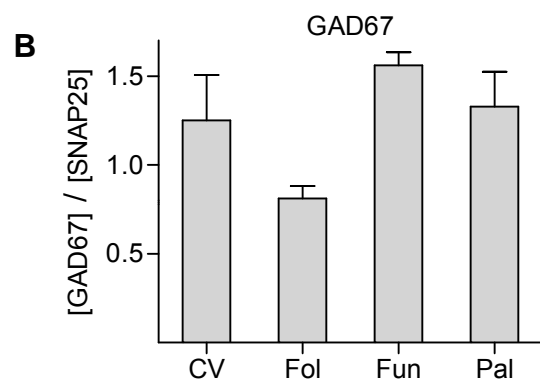

**Figure S3**

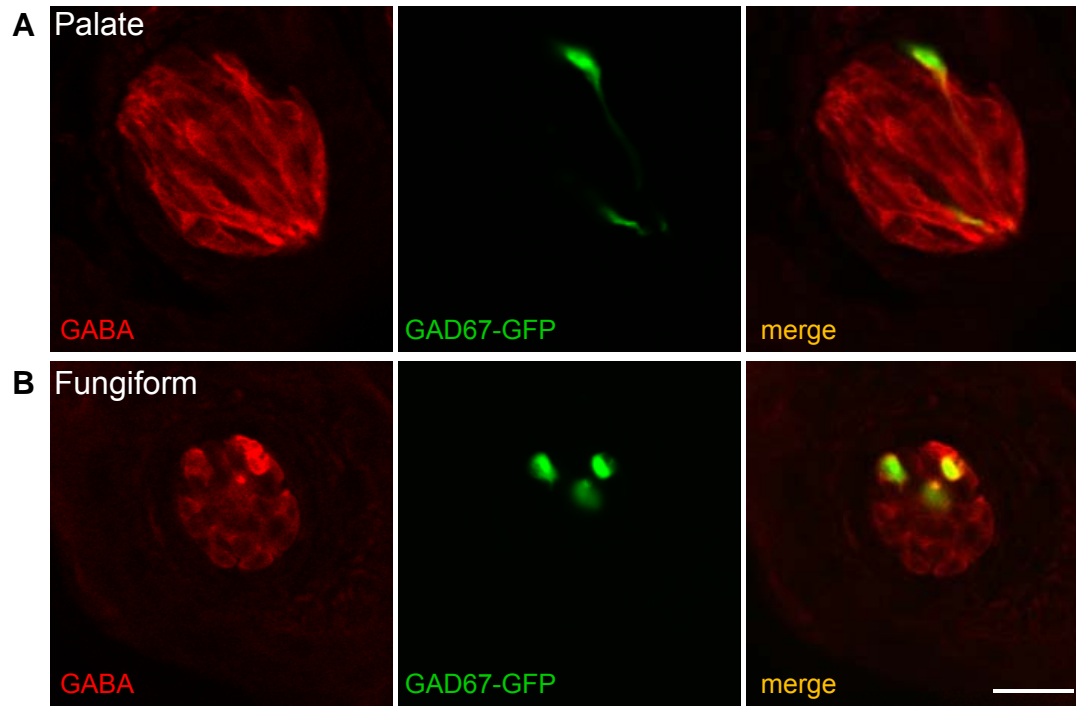

Figure S4
